# Supplementary material for: Characterizing Patient‐Centered Postoperative Recovery After Adult Cardiac Surgery: A Systematic Review
Source: PubMed Central journal article supplement — J Am Heart Assoc. 2019 Oct 16;8(21):e013546. doi: 10.1161/JAHA.119.013546 (PMC6898802; doi:10.1161/jaha.119.013546), 2019-10-16
Supplement: JAH3-8-e013546-s001.pdf [file JAH3-8-e013546-s001.pdf]

# **SUPPLEMENTAL MATERIAL**

## Data S1.

### Search terms

Medline (n=2,851):

((("postoperative period"[MeSH Terms] OR ("postoperative"[All Fields] OR "post-operative"[All Fields] AND "period"[All Fields]) OR "postoperative period"[All Fields] OR "postoperative"[All Fields] OR "postsurgical"[All Fields]) AND recovery[All Fields] AND ("cardiac surgery"[All Fields] OR "cardiac surgical procedures"[MeSH Terms] OR "cardiac surgical"[All Fields] OR "CABG"[All Fields] OR "coronary artery bypass"[All Fields] OR "valve replacement"[All Fields] OR "valve repair"[All Fields])) AND English[Language]

Web of Science (n=1,921):

(ALL= ((Postoperative OR post-operative OR "post operative" OR postsurgical OR post-surgical OR "post surgical") AND recovery AND ("cardiac surgery" OR "cardiac surgical" OR CABG OR 'coronary artery bypass' OR 'valve surgery' OR 'valve repair' OR valve replacement)))AND LANGUAGE: (English)

Final list after de-duplication (n=3,432)

**Table S1. Journal categorization by specialty.**

| Journal Name                    | Number of articles | Category         |
|---------------------------------|--------------------|------------------|
| Anesthesiology                  | 3                  | Anesthesiology   |
| J Cardiothorac Vasc Anesth      | 3                  | Anesthesiology   |
| Anaesthesia                     | 1                  | Anesthesiology   |
| Anesth Analg                    | 1                  | Anesthesiology   |
| Braz J Anesthesiol              | 1                  | Anesthesiology   |
| J Clin Anesth                   | 1                  | Anesthesiology   |
| Circulation                     | 2                  | Cardiology       |
| Am Heart J                      | 1                  | Cardiology       |
| Br Heart J                      | 1                  | Cardiology       |
| Cardiovasc Revasc Med           | 1                  | Cardiology       |
| Clin Cardiol                    | 1                  | Cardiology       |
| Eur Heart J                     | 1                  | Cardiology       |
| Heart                           | 1                  | Cardiology       |
| J Am Coll Cardiol               | 1                  | Cardiology       |
| Heart Lung                      | 9                  | Nursing          |
| Int J Nurs Stud                 | 4                  | Nursing          |
| J Adv Nurs                      | 3                  | Nursing          |
| Am J Crit Care                  | 2                  | Nursing          |
| Appl Nurs Res                   | 2                  | Nursing          |
| Eur J Cardiovasc Nurs           | 2                  | Nursing          |
| J Cardiovasc Nurs               | 2                  | Nursing          |
| Nurs Res                        | 2                  | Nursing          |
| Aust J Adv Nurs                 | 1                  | Nursing          |
| Biol Res Nurs                   | 1                  | Nursing          |
| Clin Nurs Res                   | 1                  | Nursing          |
| J Transcult Nurs                | 1                  | Nursing          |
| Prog Cardiovasc Nurs            | 1                  | Nursing          |
| West J Nurs Res                 | 1                  | Nursing          |
| Health Psychol                  | 4                  | Psych/behavioral |
| Psychosom Med                   | 3                  | Psych/behavioral |
| J Psychosom Res                 | 2                  | Psych/behavioral |
| Ann Behav Med                   | 1                  | Psych/behavioral |
| Behav Med                       | 1                  | Psych/behavioral |
| Br J Health Psychol             | 1                  | Psych/behavioral |
| Int J Behav Med                 | 1                  | Psych/behavioral |
| J Behav Med                     | 1                  | Psych/behavioral |
| Ann Thorac Surg                 | 7                  | Surgical         |
| Eur J Cardiothorac Surg         | 6                  | Surgical         |
| J Thorac Cardiovasc Surg        | 6                  | Surgical         |
| Interact Cardiovasc Thorac Surg | 2                  | Surgical         |
| Ann Thorac Cardiovasc Surg      | 1                  | Surgical         |
| J Cardiothorac Surg             | 1                  | Surgical         |
| J Surg Res                      | 1                  | Surgical         |

|                           |   |          |
|---------------------------|---|----------|
| Thorac Cardiovasc Surg    | 1 | Surgical |
| Altern Ther Health Med    | 1 | Other    |
| Ann Intern Med            | 1 | Other    |
| BMC Complement Altern Med | 1 | Other    |
| Chest                     | 1 | Other    |
| Eur J Phys Rehabil Med    | 1 | Other    |
| Geriatr Gerontol Int      | 1 | Other    |
| J Am Diet Assoc           | 1 | Other    |
| J Am Geriatr Soc          | 1 | Other    |
| Medicine (Baltimore)      | 1 | Other    |
| N Engl J Med              | 1 | Other    |
| Outcomes Manag            | 1 | Other    |
| Pain Res Treat            | 1 | Other    |
| Qual Life Res             | 1 | Other    |
| Rev Lat Am Enfermagem     | 1 | Other    |
| Telemed J E Health        | 1 | Other    |

---

Journals were categorized according to the inclusion of the specialty name in the journal title and the professional society that publishes the journal.

**Table S2. List of included studies.**

| <b>ID</b> | <b>Author</b>           | <b>Year</b> | <b>Title</b>                                                                                                                                                                                 | <b>Journal</b>          |
|-----------|-------------------------|-------------|----------------------------------------------------------------------------------------------------------------------------------------------------------------------------------------------|-------------------------|
| 1         | Newell, J. P.           | 1980        | Physical training after heart valve replacement                                                                                                                                              | Br Heart J              |
| 2         | Kulik, J. A.            | 1989        | Social support and recovery from surgery                                                                                                                                                     | Health Psychol          |
| 3         | Engblom, E.             | 1992        | Quality of life during rehabilitation after coronary artery bypass surgery                                                                                                                   | Qual Life Res           |
| 4         | King, K. B.             | 1993        | Social support and long-term recovery from coronary artery surgery: effects on patients and spouses                                                                                          | Health Psychol          |
| 5         | Artinian, N. T.         | 1995        | Sex differences in patient recovery patterns after coronary artery bypass surgery                                                                                                            | Heart Lung              |
| 6         | Bruggemans, E. F.       | 1995        | Residual cognitive dysfunctioning at 6 months following coronary artery bypass graft surgery                                                                                                 | Eur J Cardiothorac Surg |
| 7         | Moore, S. M.            | 1995        | A comparison of women's and men's symptoms during home recovery after coronary artery bypass surgery                                                                                         | Heart Lung              |
| 8         | Treasure, T.            | 1995        | Survival and quality of life in patients with protracted recovery from cardiac surgery. Can we predict poor outcome?                                                                         | Eur J Cardiothorac Surg |
| 9         | Jenkins, C. D.          | 1996        | Predicting completeness of symptom relief after major heart surgery                                                                                                                          | Behav Med               |
| 10        | Redeker, N. S.          | 1996        | Sleep patterns in women after coronary artery bypass surgery                                                                                                                                 | Appl Nurs Res           |
| 11        | Edell-Gustafsson, U. M. | 1999        | Sleep and quality of life assessment in patients undergoing coronary artery bypass grafting                                                                                                  | J Adv Nurs              |
| 12        | Elizur, Y.              | 1999        | Psychosocial adjustment and mental health two months after coronary artery bypass surgery: a multisystemic analysis of patients' resources                                                   | J Behav Med             |
| 13        | Grossi, E. A.           | 1999        | Comparison of post-operative pain, stress response, and quality of life in port access vs. standard sternotomy coronary bypass patients                                                      | Eur J Cardiothorac Surg |
| 14        | Arthur, H. M.           | 2000        | Effect of a preoperative intervention on preoperative and postoperative outcomes in low-risk patients awaiting elective coronary artery bypass graft surgery. A randomized, controlled trial | Ann Intern Med          |
| 15        | Heijmeriks, J. A.       | 2000        | The incidence and consequences of mental disturbances in elderly patients post cardiac surgery--a comparison with younger patients                                                           | Clin Cardiol            |
| 16        | King, K. M.             | 2000        | Gender and short-term recovery from cardiac surgery                                                                                                                                          | Nurs Res                |

|    |                 |      |                                                                                                                                                                                                    |                            |
|----|-----------------|------|----------------------------------------------------------------------------------------------------------------------------------------------------------------------------------------------------|----------------------------|
| 17 | Ovrum, E.       | 2000 | Rapid recovery protocol applied to 5,658 consecutive "on-pump" coronary bypass patients                                                                                                            | Ann Thorac Surg            |
| 18 | Parent, N.      | 2000 | A randomized, controlled trial of vicarious experience through peer support for male first-time cardiac surgery patients: impact on anxiety, self-efficacy expectation, and self-reported activity | Heart Lung                 |
| 19 | Ebert, A. D.    | 2001 | Early neurobehavioral disorders after cardiac surgery: a comparative analysis of coronary artery bypass graft surgery and valve replacement                                                        | J Cardiothorac Vasc Anesth |
| 20 | Fearn, S. J.    | 2001 | Cerebral injury during cardiopulmonary bypass: emboli impair memory                                                                                                                                | J Thorac Cardiovasc Surg   |
| 21 | McCrone, S.     | 2001 | Anxiety and depression: incidence and patterns in patients after coronary artery bypass graft surgery                                                                                              | Appl Nurs Res              |
| 22 | Myles, P. S.    | 2001 | Relation between quality of recovery in hospital and quality of life at 3 months after cardiac surgery                                                                                             | Anesthesiology             |
| 23 | Newman, M. F.   | 2001 | Longitudinal assessment of neurocognitive function after coronary-artery bypass surgery                                                                                                            | N Engl J Med               |
| 24 | Borkon, A. M.   | 2002 | A comparison of the recovery of health status after percutaneous coronary intervention and coronary artery bypass                                                                                  | Ann Thorac Surg            |
| 25 | Koivula, M.     | 2002 | Fear and anxiety in patients at different time-points in the coronary artery bypass process                                                                                                        | Int J Nurs Stud            |
| 26 | Mahler, H. I.   | 2002 | Effects of a videotape information intervention for spouses on spouse distress and patient recovery from surgery                                                                                   | Health Psychol             |
| 27 | Shuldham, C. M. | 2002 | The impact of pre-operative education on recovery following coronary artery bypass surgery. A randomized controlled clinical trial                                                                 | Eur Heart J                |
| 28 | Zimmerman, L.   | 2002 | Comparison of recovery patterns for patients undergoing coronary artery bypass grafting and minimally invasive direct coronary artery bypass in the early discharge period                         | Prog Cardiovasc Nurs       |
| 29 | DiMattio, M. J. | 2003 | A longitudinal study of functional status and correlates following coronary artery bypass graft surgery in women                                                                                   | Nurs Res                   |
| 30 | Jarvinen, O.    | 2003 | Changes in health-related quality of life and functional capacity following coronary artery bypass graft surgery                                                                                   | Eur J Cardiothorac Surg    |
| 31 | Pierson, L. M.  | 2003 | Recovery of self-reported functional capacity after coronary artery bypass surgery                                                                                                                 | Chest                      |
| 32 | Stygall, J.     | 2003 | Cognitive change 5 years after coronary artery bypass surgery                                                                                                                                      | Health Psychol             |
| 33 | Vaccarino, V.   | 2003 | Gender differences in recovery after coronary artery bypass surgery                                                                                                                                | J Am Coll Cardiol          |

|    |                   |      |                                                                                                                                                                    |                          |
|----|-------------------|------|--------------------------------------------------------------------------------------------------------------------------------------------------------------------|--------------------------|
| 34 | Koch, C. G.       | 2004 | Health-related quality of life after coronary artery bypass grafting: a gender analysis using the Duke Activity Status Index                                       | J Thorac Cardiovasc Surg |
| 35 | Kulik, A.         | 2004 | Postoperative naproxen after coronary artery bypass surgery: a double-blind randomized controlled trial                                                            | Eur J Cardiothorac Surg  |
| 36 | Milgrom, L. B.    | 2004 | Pain levels experienced with activities after cardiac surgery                                                                                                      | Am J Crit Care           |
| 37 | Miller, K. H.     | 2004 | Comparison of symptoms of younger and older patients undergoing coronary artery bypass surgery                                                                     | Clin Nurs Res            |
| 38 | Tranmer, J. E.    | 2004 | Enhancing postoperative recovery of cardiac surgery patients: a randomized clinical trial of an advanced practice nursing intervention                             | West J Nurs Res          |
| 39 | Zimmerman, L.     | 2004 | Symptom management intervention in elderly coronary artery bypass graft patients                                                                                   | Outcomes Manag           |
| 40 | Doering, L. V.    | 2005 | Depression, healing, and recovery from coronary artery bypass surgery                                                                                              | Am J Crit Care           |
| 41 | Koch, C. G.       | 2005 | Impact of prosthesis-patient size on functional recovery after aortic valve replacement                                                                            | Circulation              |
| 42 | Utriyaprasit, K.  | 2005 | Recovery symptoms and mood states in Thai CABG patients                                                                                                            | J Transcult Nurs         |
| 43 | Barnason, S.      | 2006 | Impact of a telehealth intervention to augment home health care on functional and recovery outcomes of elderly patients undergoing coronary artery bypass grafting | Heart Lung               |
| 44 | King, K. M.       | 2006 | A randomized controlled trial of women's early use of a novel undergarment following sternotomy: the Women's Recovery from Sternotomy Trial (WREST)                | Am Heart J               |
| 45 | Koch, C. G.       | 2006 | Persistent effect of red cell transfusion on health-related quality of life after cardiac surgery                                                                  | Ann Thorac Surg          |
| 46 | Kortke, H.        | 2006 | New East-Westfalian Postoperative Therapy Concept: a telemedicine guide for the study of ambulatory rehabilitation of patients after cardiac surgery               | Telemed J E Health       |
| 47 | Okkonen, E.       | 2006 | Family support, living alone, and subjective health of a patient in connection with a coronary artery bypass surgery                                               | Heart Lung               |
| 48 | Phillips-Bute, B. | 2006 | Association of neurocognitive function and quality of life 1 year after coronary artery bypass graft (CABG) surgery                                                | Psychosom Med            |
| 49 | Ballan, A.        | 2007 | A comparative study of patient perceived quality of life pre and post coronary artery bypass graft surgery                                                         | Aust J Adv Nurs          |

|    |                  |      |                                                                                                                                                                                                                                |                            |
|----|------------------|------|--------------------------------------------------------------------------------------------------------------------------------------------------------------------------------------------------------------------------------|----------------------------|
| 50 | Koch, C. G.      | 2007 | Effect of functional health-related quality of life on long-term survival after cardiac surgery                                                                                                                                | Circulation                |
| 51 | Lopez, V.        | 2007 | Physical, psychological and social recovery patterns after coronary artery bypass graft surgery: a prospective repeated measures questionnaire survey                                                                          | Int J Nurs Stud            |
| 52 | Miller, C.       | 2007 | Impact of an early recovery management intervention on functioning in postoperative coronary artery bypass patients with diabetes                                                                                              | Heart Lung                 |
| 53 | Barnason, S.     | 2008 | Relationships between fatigue and early postoperative recovery outcomes over time in elderly patients undergoing coronary artery bypass graft surgery                                                                          | Heart Lung                 |
| 54 | Chiu, K. M.      | 2008 | Local infusion of bupivacaine combined with intravenous patient-controlled analgesia provides better pain relief than intravenous patient-controlled analgesia alone in patients undergoing minimally invasive cardiac surgery | J Thorac Cardiovasc Surg   |
| 55 | King, K. M.      | 2008 | Women's Recovery from Sternotomy-Extension (WREST-E) study: examining long-term pain and discomfort following sternotomy and their predictors                                                                                  | Heart                      |
| 56 | Lena, P.         | 2008 | Fast-track anesthesia with remifentanil and spinal analgesia for cardiac surgery: the effect on pain control and quality of recovery                                                                                           | J Cardiothorac Vasc Anesth |
| 57 | MacIntyre, B.    | 2008 | The efficacy of healing touch in coronary artery bypass surgery recovery: a randomized clinical trial                                                                                                                          | Altern Ther Health Med     |
| 58 | Panagopoulou, E. | 2008 | Symptoms of traumatic stress after coronary artery bypass grafting                                                                                                                                                             | Int J Behav Med            |
| 59 | Sandau, K. E.    | 2008 | Health-related quality of life and subjective neurocognitive function three months after coronary artery bypass graft surgery                                                                                                  | Heart Lung                 |
| 60 | Chunta, K. S.    | 2009 | Expectations, anxiety, depression, and physical health status as predictors of recovery in open-heart surgery patients                                                                                                         | J Cardiovasc Nurs          |
| 61 | Koster, S.       | 2009 | The long-term cognitive and functional outcomes of postoperative delirium after cardiac surgery                                                                                                                                | Ann Thorac Surg            |
| 62 | Rantanen, A.     | 2009 | Health-related quality of life after coronary artery bypass grafting                                                                                                                                                           | J Adv Nurs                 |
| 63 | Routledge, F. S. | 2009 | The influence of coronary artery bypass graft harvest site on women's pain, functional status, and health services utilization throughout the first post-operative year: a longitudinal study                                  | Int J Nurs Stud            |



|    |                   |      |                                                                                                                                                                                 |                                 |
|----|-------------------|------|---------------------------------------------------------------------------------------------------------------------------------------------------------------------------------|---------------------------------|
| 64 | Abbott, A. A.     | 2010 | Symptom burden clusters and their impact on psychosocial functioning following coronary artery bypass surgery                                                                   | J Cardiovasc Nurs               |
| 65 | Hudetz, J. A.     | 2010 | Preoperative dispositional optimism correlates with a reduced incidence of postoperative delirium and recovery of postoperative cognitive function in cardiac surgical patients | J Cardiothorac Vasc Anesth      |
| 66 | Juergens, M. C.   | 2010 | Illness beliefs before cardiac surgery predict disability, quality of life, and depression 3 months later                                                                       | J Psychosom Res                 |
| 67 | Keith, M.         | 2010 | Evaluation of taste sensitivity in patients undergoing coronary artery bypass graft surgery                                                                                     | J Am Diet Assoc                 |
| 68 | Morone, N. E.     | 2010 | The impact of pain and depression on recovery after coronary artery bypass grafting                                                                                             | Psychosom Med                   |
| 69 | Rudolph, J. L.    | 2010 | Delirium: an independent predictor of functional decline after cardiac surgery                                                                                                  | J Am Geriatr Soc                |
| 70 | Utriyaprasit, K.  | 2010 | Recovery after coronary artery bypass surgery: effect of an audiotape information programme                                                                                     | J Adv Nurs                      |
| 71 | Caputo, M.        | 2011 | Thoracic epidural anesthesia improves early outcomes in patients undergoing off-pump coronary artery bypass surgery: a prospective, randomized, controlled trial                | Anesthesiology                  |
| 72 | Fedak, P. W.      | 2011 | Adhesive-enhanced sternal closure to improve postoperative functional recovery: a pilot, randomized controlled trial                                                            | Ann Thorac Surg                 |
| 73 | Rosenfeldt, F.    | 2011 | Physical conditioning and mental stress reduction- a randomised trial in patients undergoing cardiac surgery                                                                    | BMC Complement Altern Med       |
| 74 | Zimmerman, L.     | 2011 | Gender differences in recovery outcomes after an early recovery symptom management intervention                                                                                 | Heart Lung                      |
| 75 | Chapman, C. R.    | 2012 | Postoperative pain trajectories in cardiac surgery patients                                                                                                                     | Pain Res Treat                  |
| 76 | Guo, P.           | 2012 | A preoperative education intervention to reduce anxiety and improve recovery among Chinese cardiac patients: a randomized controlled trial                                      | Int J Nurs Stud                 |
| 77 | Hirschhorn, A. D. | 2012 | Does the mode of exercise influence recovery of functional capacity in the early postoperative period after coronary artery bypass graft surgery? A randomized controlled trial | Interact Cardiovasc Thorac Surg |
| 78 | Kopp, M.          | 2012 | Psychomotor car-driving abilities after robotically assisted totally endoscopic coronary artery bypass grafting                                                                 | Thorac Cardiovasc Surg          |
| 79 | Martin, L. M.     | 2012 | Health-related quality of life after coronary artery bypass grafting surgery and the role of gender                                                                             | Cardiovasc Revasc Med           |

|    |                        |      |                                                                                                                                                       |                            |
|----|------------------------|------|-------------------------------------------------------------------------------------------------------------------------------------------------------|----------------------------|
| 80 | Bruce, K. M.           | 2013 | Recovery of cognitive function after coronary artery bypass graft operations                                                                          | Ann Thorac Surg            |
| 81 | Cook, D. J.            | 2013 | Functional recovery in the elderly after major surgery: assessment of mobility recovery using wireless technology                                     | Ann Thorac Surg            |
| 82 | Fontes, M. T.          | 2013 | Predictors of cognitive recovery after cardiac surgery                                                                                                | Anesth Analg               |
| 83 | DiMaria-Ghalili, R. A. | 2014 | Inflammation, functional status, and weight loss during recovery from cardiac surgery in older adults: a pilot study                                  | Biol Res Nurs              |
| 84 | Jonsson, M.            | 2014 | Self-reported physical activity and lung function two months after cardiac surgery--a prospective cohort study                                        | J Cardiothorac Surg        |
| 85 | Mello, L. C.           | 2014 | Assessment of pain during rest and during activities in the postoperative period of cardiac surgery                                                   | Rev Lat Am Enfermagem      |
| 86 | Poole, L.              | 2014 | Preoperative sleep complaints are associated with poor physical recovery in the months following cardiac surgery                                      | Ann Behav Med              |
| 87 | Ronaldson, A.          | 2014 | Optimism measured pre-operatively is associated with reduced pain intensity and physical symptom reporting after coronary artery bypass graft surgery | J Psychosom Res            |
| 88 | Min, L.                | 2015 | Longitudinal functional recovery after geriatric cardiac surgery                                                                                      | J Surg Res                 |
| 89 | Monteleone, S.         | 2015 | Recovery of deambulation after cardiothoracic surgery: a single center experience                                                                     | Eur J Phys Rehabil Med     |
| 90 | Yang, M.               | 2015 | Comparison of postoperative quality of life for patients who undergo atrial myxoma excision with robotically assisted versus conventional surgery     | J Thorac Cardiovasc Surg   |
| 91 | Amofah, H. A.          | 2016 | Sleep in octogenarians during the postoperative phase after transcatheter or surgical aortic valve replacement                                        | Eur J Cardiovasc Nurs      |
| 92 | Guimaraes-Pereira, L.  | 2016 | Quality of recovery after anaesthesia measured with QoR-40: a prospective observational study                                                         | Braz J Anesthesiol         |
| 93 | Kidd, T.               | 2016 | Attachment anxiety predicts depression and anxiety symptoms following coronary artery bypass graft surgery                                            | Br J Health Psychol        |
| 94 | Lin, Y.                | 2016 | Cardiac Valve Noise Reduction by Non-Drug Interventions Improves the Sleep Quality of Patients after Mechanical Cardiac Valve Implantation            | Ann Thorac Cardiovasc Surg |
| 95 | Niemeyer-Guimaraes, M. | 2016 | Course of functional status in elderly patients after coronary artery bypass surgery: 6-month follow up                                               | Geriatr Gerontol Int       |

|     |                  |      |                                                                                                                                                                                            |                                 |
|-----|------------------|------|--------------------------------------------------------------------------------------------------------------------------------------------------------------------------------------------|---------------------------------|
| 96  | Petersen, J.     | 2016 | Physical and mental recovery after conventional aortic valve surgery                                                                                                                       | J Thorac Cardiovasc Surg        |
| 97  | Rasmussen, L. A. | 2016 | Ultrashort acting remifentanyl is not superior to long-acting sufentanil in preserving cognitive function-a randomized study                                                               | J Clin Anesth                   |
| 98  | Hansen, L. S.    | 2017 | Early, dedicated follow-up and treatment of pleural effusions enhance the recovery rate after open cardiac surgery: results from a randomized, clinical trial                              | Eur J Cardiothorac Surg         |
| 99  | Knipp, S. C.     | 2017 | Early and long-term cognitive outcome after conventional cardiac valve surgery                                                                                                             | Interact Cardiovasc Thorac Surg |
| 100 | Royse, C. F.     | 2017 | Impact of Methylprednisolone on Postoperative Quality of Recovery and Delirium in the Steroids in Cardiac Surgery Trial: A Randomized, Double-blind, Placebo-controlled Substudy           | Anesthesiology                  |
| 101 | Salzmann, S.     | 2017 | Effects of Preoperative Psychological Interventions on Catecholamine and Cortisol Levels After Surgery in Coronary Artery Bypass Graft Patients: The Randomized Controlled PSY-HEART Trial | Psychosom Med                   |
| 102 | Bowyer, A. J.    | 2018 | Validation of the cognitive recovery assessments with the Postoperative Quality of Recovery Scale in patients with low-baseline cognition                                                  | Anaesthesia                     |
| 103 | Chen, Y. C.      | 2018 | Validating the 6-minute walk test as an indicator of recovery in patients undergoing cardiac surgery: A prospective cohort study                                                           | Medicine (Baltimore)            |
| 104 | Colella, T. J.   | 2018 | The effect of a peer support intervention on early recovery outcomes in men recovering from coronary bypass surgery: A randomized controlled trial                                         | Eur J Cardiovasc Nurs           |
| 105 | Diab, M. S.      | 2018 | The influence of prolonged intensive care stay on quality of life, recovery, and clinical outcomes following cardiac surgery: A prospective cohort study                                   | J Thorac Cardiovasc Surg        |

Given few studies with extremely large samples compared to the median sample size, we qualitatively described studies with the largest sample sizes to evaluate whether we could make a strong inference on normative recovery pattern. The largest study (n= 7,321), Study 45, obtained measurements at only two time points, first of which was 180 days after the operation. The second largest study (n=5,658), Study 17, obtained measurements in a single-center setting at 7 time points but only within the first 7 days, and only assessed the proportion of patients ambulating on each day.

**Table S3. Number of articles by journal category.**

| <b>Journal category</b> | <b>N (105)</b> | <b>%</b> |
|-------------------------|----------------|----------|
| Nursing                 | 32             | 30       |
| Surgical                | 25             | 24       |
| Psych/behavioral*       | 14             | 13       |
| Anesthesia              | 10             | 10       |
| Cardiology              | 9              | 9        |
| Other                   | 15             | 14       |

\*Psych/behavioral category includes psychology, psychiatry, and behavioral medicine.

**Table S4. Qualitative summary of predictors and interventions associated with improved recovery.**

| Factors related to better recovery | Categories | Predictors/Intervention                                                                                                                                                                                                                                                                                                                                                                                                                                       |
|------------------------------------|------------|---------------------------------------------------------------------------------------------------------------------------------------------------------------------------------------------------------------------------------------------------------------------------------------------------------------------------------------------------------------------------------------------------------------------------------------------------------------|
| Interventions                      | Surgical   | Adhesive-enhanced sternal closure, not using cardiopulmonary bypass, minimally-invasive access surgery, CABG without internal mammary artery use                                                                                                                                                                                                                                                                                                              |
|                                    | Medical    | High-dose methylprednisolone, postoperative patient-controlled analgesia, postoperative naproxen, epidural anesthesia, fast-track anesthesia protocol, avoiding blood transfusion                                                                                                                                                                                                                                                                             |
|                                    | Other      | Preoperative patient education, preoperative exercise training, use of special undergarment for women, telehealth follow-up, rehabilitation facility use compared to hospital rehabilitation, ear plug use after mechanical valve replacement, dyadic support, discharge instruction audiotape, additional follow up, healing touch, preoperative psychological intervention                                                                                  |
| Predictors                         |            | Men, women, younger age, shorter ICU stay, better baseline physical and cognitive function, higher number of steps taken after operation, lack of depression and baseline pain, better early recovery (predicts better late recovery), having social support, lower number of microemboli during operation, lower symptom burden, lower stress/anxiety/depression, lack of postoperative delirium, preoperative optimism, lack of preoperative sleep problems |

**Figure S1. Number of publications by year.**

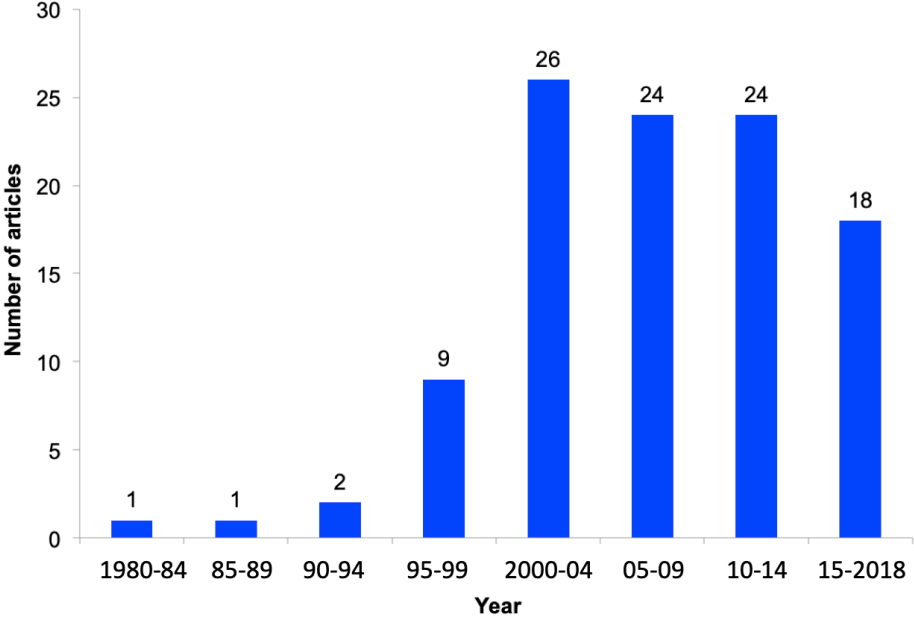

Number of articles published by 5-year increment of calendar year. No publication published prior to 1980 met the inclusion criteria. The latest bin (2015-2018) includes only 4-year period.

**Figure S2. Bubble chart of studies by the study characteristics up to 400 follow-up days.**

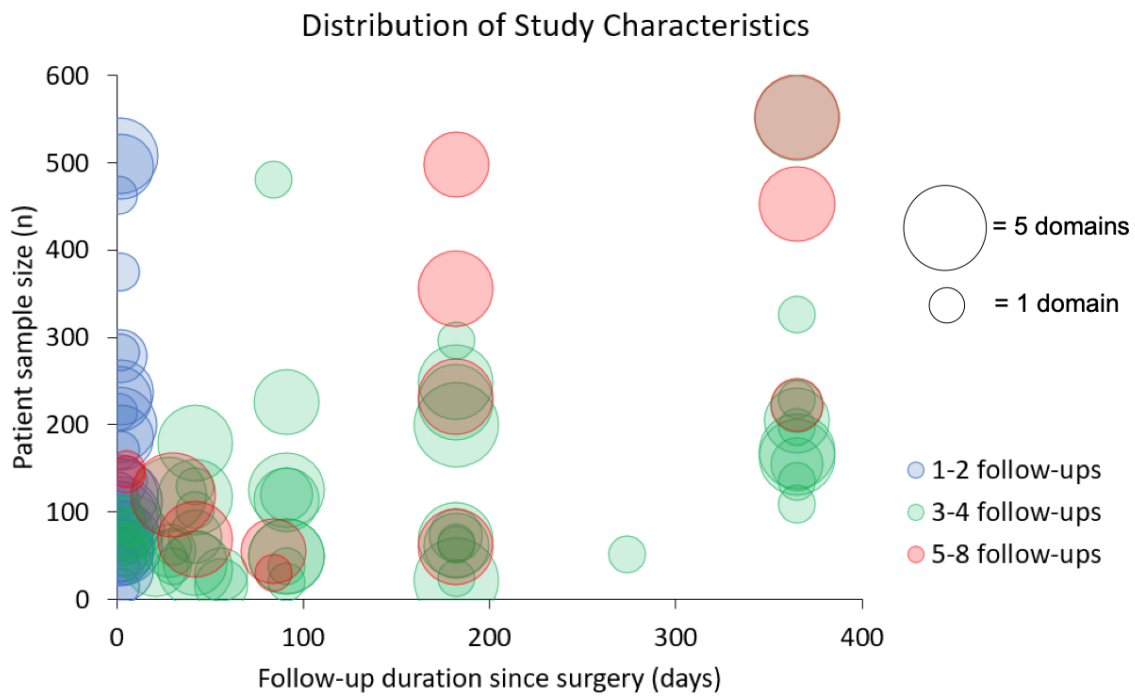

Studies by the duration of follow-up (x-axis) up to 400 days, sample size (y-axis) up to 600 patients, number of domains evaluated (bubble size), and number of follow-ups at which time the measurements were obtained (color). Six possible domains are: nociceptive symptoms, activity of daily living, cognitive, sleep, mental health, and physical function.
